# Supplementary material for: Fusion-Assisted Hydrothermal Synthesis and Post-Synthesis Modification of Mesoporous Hydroxy Sodalite Zeolite Prepared from Waste Coal Fly Ash for Biodiesel Production
Source: MDPI journal article supplement (doi:10.3390/catal12121652), 2022-12-15
Supplement: s1 [file s1]

## Supplementary Materials

*Structural features of HS zeolite and common zeolites used in biodiesel production*

**Table S1.** Motive catalytic application of hydroxy sodalite over common biodiesel zeolite catalysts.

| Zeolite                       | HS                                                                                | Zeolite (Na)X (FAU)                                                               | ZSM-5                                                                              | Reference                                                                                                                                   |
|-------------------------------|-----------------------------------------------------------------------------------|-----------------------------------------------------------------------------------|------------------------------------------------------------------------------------|---------------------------------------------------------------------------------------------------------------------------------------------|
| Structure                     | 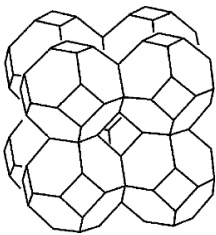 |  |  | Miteva and Stoyanova [66]; Daramola, et al. [67]                                                                                            |
| Structure type<br>(pore size) | 4-rings (2.8 Å)                                                                   | 12-ring (7.3 Å)                                                                   | 10-rings (32 Å)                                                                    | Xu, et al. [68];<br>Nanganoa, Mbadcam and Kang [34]; Miteva and Stoyanova [66]                                                              |
| Si/Al ratio                   | 0.84–1                                                                            | 1–1.5 (1.23)                                                                      | 16–50                                                                              | Golbad, Khoshnoud and Abu-Zahra [43]; Ferreira Madeira, Ben Tayeb, Pinard, Vezin, Maury and Cadran [26]; Sun, Lu, Ma, Han, Fu and Ding [21] |

### Textural properties of produced catalysts

**Table S2.** Textural properties of F-HS, post-synthesis ion exchange-modified F-HS (K/F-HS) and of direct method-derived HS.

| Synthesis method             | Sample | Surface area (m <sup>2</sup> / g) |                      |        | Pore volume (cm <sup>3</sup> /g) |                      | Pore size <sup>(e)</sup> (nm) |
|------------------------------|--------|-----------------------------------|----------------------|--------|----------------------------------|----------------------|-------------------------------|
|                              |        | Total <sup>(a)</sup>              | Meso. <sup>(b)</sup> | Micro. | Total <sup>(c)</sup>             | Micro <sup>(d)</sup> |                               |
| <b>Fusion</b>                | F-HS   | 45.0                              | 42.2                 | 2.7    | 0.148                            | 0.018                | 12.99–15.31                   |
| <b>Ion exchange</b>          | K/F-HS | 25.8                              | 25.0                 | 0.8    | 0.0614                           | 0.00081              | 9.5–12.2                      |
| <sup>(f)</sup> <b>Direct</b> | HS     | 13.2                              | 12.6                 | 0.56   | 0.08                             | 0.00042              | 22.24–27.58                   |

F-HS: indirect fusion-derived HS zeolite; F-HS: Post-synthesis ion exchange modified HS zeolite; <sup>(a)</sup> Obtained by BET equation / method at  $p/p^0 = 0.99$ ; <sup>(b)</sup> Measured by t-plot method, which defines pores in the sample of 2–50 nm (mesopore) and <2 nm (micro) in width [47]; <sup>(c)</sup> Estimated at from adsorbed amount at  $p/p^0 = 0.99$  or derived from BJH adsorption isotherms as “cumulative volume of pores”; <sup>(d)</sup> Derived from single point adsorption isotherms as “cumulative volume of pores”; <sup>(e)</sup> Measured by t-plot method; <sup>(f)</sup> Average pore diameters or width derived from adsorption isotherms using BJH method; <sup>(f)</sup> HS Sample obtained from CFA via Direct hydrothermal synthesis method [48].

### Ion exchange post-modification of HS zeolite

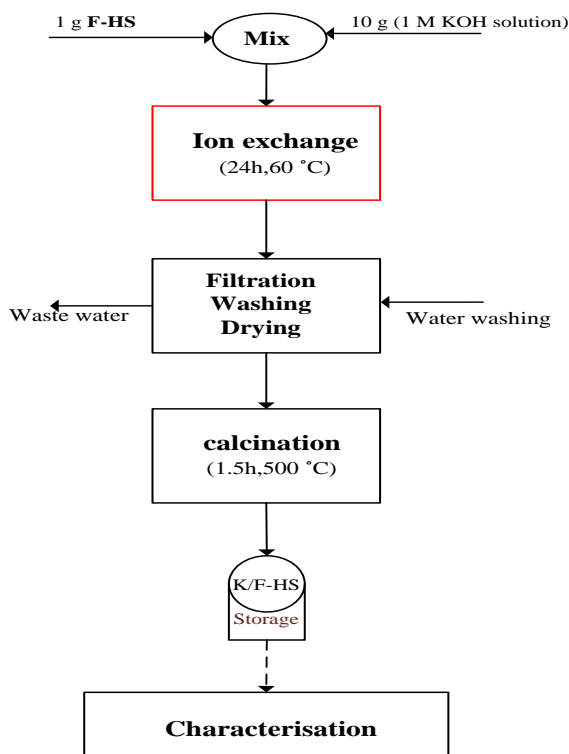

**Figure S1.** Schematic flow diagram of ion exchange post-synthesis modification of HS zeolite.

*Biodiesel production*

## Schematic process flow

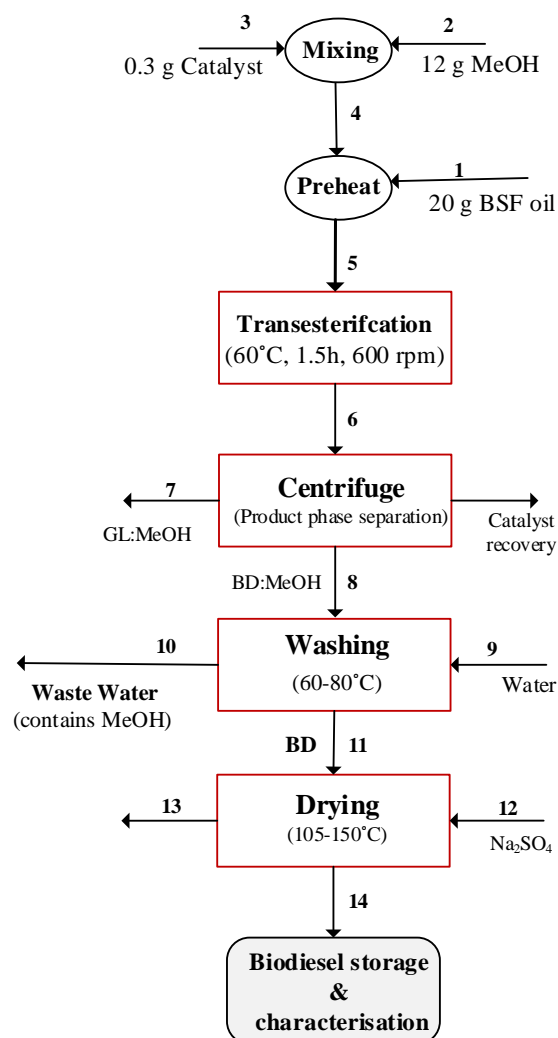

**Figure S2.** Process flow illustration of biodiesel production from waste-derived BSF oil using synthesised catalysts (BSF = waste-derived maggot oil; MeOH = methanol; GL= glycerol).

## Techno-economic evaluation data

**Table S3.** Estimated unit cost of raw material and biodiesel products.

| Component material                         | Cost (\$/kg)* | Source/Reference                                  |
|--------------------------------------------|---------------|---------------------------------------------------|
| <sup>(a)</sup> BSF oil                     | 0.52          | Hajjari, Tabatabaei, Aghbashlo and Ghanavati [10] |
| NaOH Pellets AR (98.5%)                    | 16.91         | WorldofScience [69]                               |
| Methanol (MeOH)                            | -             | -                                                 |
| Process water (P. H <sub>2</sub> O)        | 0.002         | CCT [70]                                          |
| Wastewater treatment                       | 0.00000137    | Hong, <i>et al.</i> [71]                          |
| <sup>(b)</sup> HS                          | 77.64         |                                                   |
| Biodiesel                                  | 0.5/L         | You, Shie, Chang, Huang, Pai, Yu and Chang [4]    |
| <sup>(c)</sup> BSF biodiesel (NaOH-Trans.) | 0.58          |                                                   |
| <sup>(d)</sup> BSF biodiesel (F-HS Trans.) | 0.57          |                                                   |

<sup>(a)</sup> BSF oil, assumed same as WCO = \$0.52/kg

Density of NaOH-transesterified biodiesel = 0,862 g/mL; 1L = 0,862 [6]

Density of F-HS Transesterified biodiesel = 0,877 g/mL; 1L = 0,877 kg (Table 5)

<sup>(c)&(d)</sup> Biodiesel cost in \$/kg = \$ 0.5/L multiplied by respective density values

<sup>(b)</sup> Price of HS taken as that of Molecular sieves, 13X; chemical equation  $\text{Na}_{86}[\text{AlO}_2]_{86}(\text{SiO}_2)_{106} \cdot x\text{H}_2\text{O}$ , \$77.64

\*Prices converted to US dollar (\$), based on standard prices in South Africa (ZAR, rands) : USD-to-ZAR 2022 average exchange rate of \$1 = R16.32

**Table S4.** Mass balance and material cost comparison between biodiesel production using NaOH conventional homogenous catalyst and HS novel heterogeneous catalyst.

| Operating conditions                 | Catalyst                                 |                                          |
|--------------------------------------|------------------------------------------|------------------------------------------|
|                                      | NaOH                                     | F-HS                                     |
| Catalyst weight (wt. %)              | 1.5                                      | 1.5                                      |
| MeOH/oil ratio ( <i>n/n</i> )        | 15:01                                    | 15:01                                    |
| Temperature (°C)                     | 60                                       | 60                                       |
| <b>Components (Input) (g)</b>        |                                          |                                          |
| BSF oil                              | 20                                       | 20                                       |
| Catalyst mass                        | 0.3                                      | 0.3                                      |
| Methanol                             | 11.95                                    | 11.95                                    |
| Process wash water                   | 231.95                                   | 223.7                                    |
| <b>Components (Output) (g)</b>       |                                          |                                          |
| Mass of biodiesel                    | 13.99                                    | 16.82                                    |
| Biodiesel yield (%)                  | 69.93                                    | 84.10                                    |
| <b>Components (kg/kg biodiesel)</b>  |                                          |                                          |
| BSF oil                              | 1.430                                    | 1.189                                    |
| Catalyst                             | 0.021                                    | 0.018                                    |
| Methanol                             | 0.85                                     | 0.71                                     |
| Process washwater (BD purification)  | 16.59                                    | 13.30                                    |
| Biodiesel                            | 1.00                                     | 1.00                                     |
| <b>*Component (\$/ kg biodiesel)</b> |                                          |                                          |
| BSF oil                              | <b>0.74</b>                              | <b>0.62</b>                              |
| Catalyst                             | <b>0.363</b>                             | <b>1.385</b>                             |
| Methanol                             | -                                        | -                                        |
| Process washwater (influent)         | <b>0.033</b>                             | <b>0.027</b>                             |
| Wastewater (effluent) treatment      | <b><math>2.27 \times 10^{-05}</math></b> | <b><math>1.82 \times 10^{-05}</math></b> |
| Biodiesel (based on Table S3)        | 0.58                                     | 0.57                                     |
| Reference                            | <sup>(a)</sup> Previous work [6]         | This work                                |

<sup>(a)</sup> Only NaOH catalytic performance referenced from previous work; cost analysis conducted in this study

\* Costing component difference between catalysts usage, e.g. with regards to BSF oil

$$= \frac{|Cost\ of\ component\ over\ NaOH - Cost\ of\ component\ over\ F-HS|}{cost\ of\ component\ over\ NaOH} \times 100 = \frac{0.74 - 0.62}{0.74} \times 100 = \sim 19.35\%$$
