# Supplementary material for: Fusion-Assisted Hydrothermal Synthesis and Post-Synthesis Modification of Mesoporous Hydroxy Sodalite Zeolite Prepared from Waste Coal Fly Ash for Biodiesel Production
Source: MDPI journal article supplement (doi:10.3390/catal12121652), 2022-12-15
Supplement: s1 [file s1]

Archive with 1 entries (1 files):
- catalysts-1976722-supplementary.pdf
